# Supplementary material for: Highly time resolved chemical characterization of submicron organic aerosols at a polluted urban location
Source: Royal Society of Chemistry journal article supplement (doi:10.1039/c6em00392c), 2016-01-01
Supplement: c6em00392c1.pdf [file c6em00392c1.pdf]

1 **Supplementary Information of**

2 **Highly time resolved chemical characterization of submicron organic aerosols**

3 **at a polluted urban location**

4 **Authors:** N.V.S Bharath Kumar <sup>1</sup>, Abhishek Chakraborty <sup>1</sup>, S.N.Tripathi<sup>1, 2\*</sup> and Deepika

5 Bhattu<sup>1</sup>

6 **Author affiliation:** 1. Department of Civil Engineering Indian Institute of Technology, Kanpur

7 2. Centre of Environmental Science and Engineering, CESE, IIT Kanpur

8 \*Corresponding author(s) E-mail: [snt@iitk.ac.in](mailto:snt@iitk.ac.in)

9  
10  
11 Figures: S1-S9

12 Page: S1-S8

13 Tables: S1

14

15

16

17

18

19

20

21

22

23

24

25

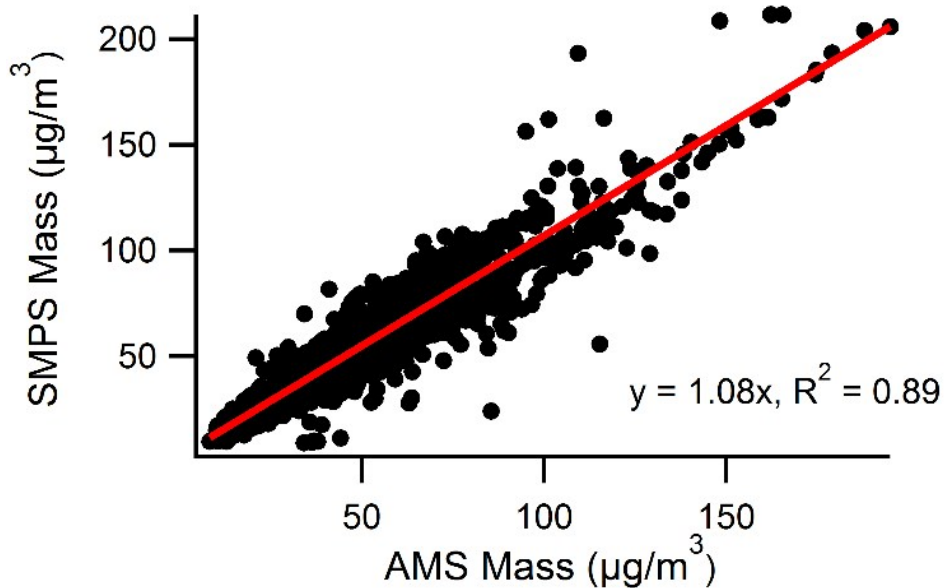

26

27 Fig. S1: AMS vs SMPS mass concentration plot to justify the choice of CE value of 0.5. SMPS  
 28 mass is obtained from volume concentration by assuming a density of 1.4 g/cc as reported in  
 29 previous studies <sup>1,2</sup> from this location.

30

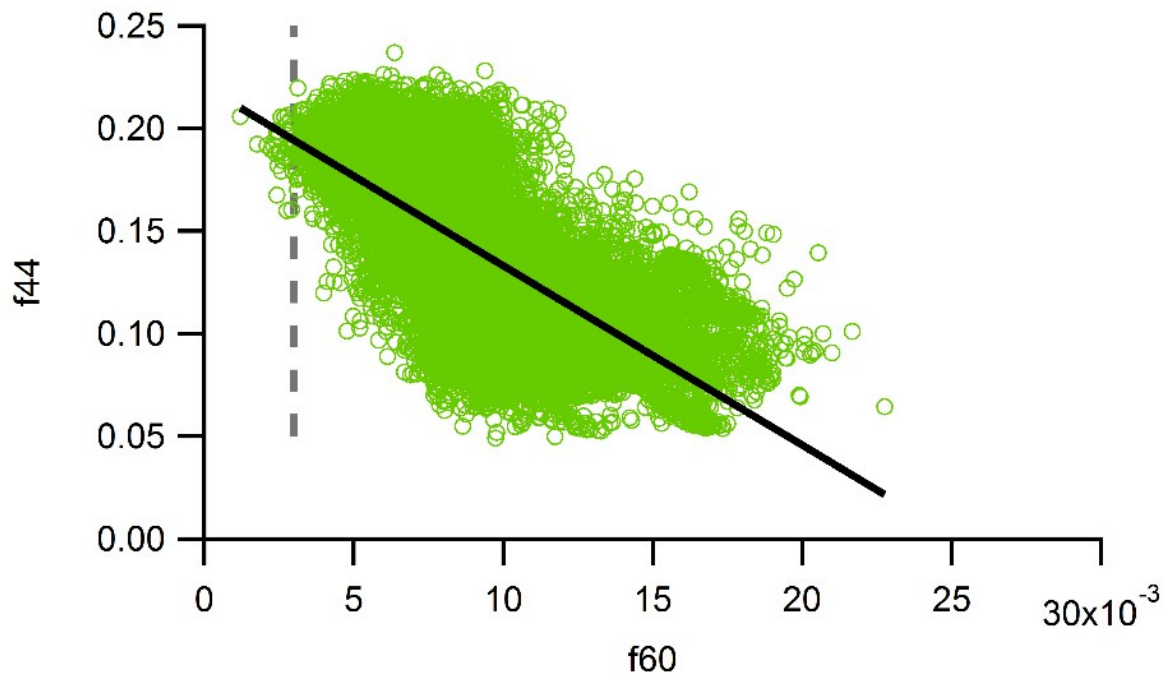

31

32 Fig. S2:  $f_{44}$  vs  $f_{60}$  plot to demonstrate the oxidation of biomass burning organic aerosol. Grey  
 33 dashed line denotes the background  $f_{60}$  value taken from Cubison et al., (2011)<sup>3</sup>.

34

35 **1. Organic PMF Diagnostics:**

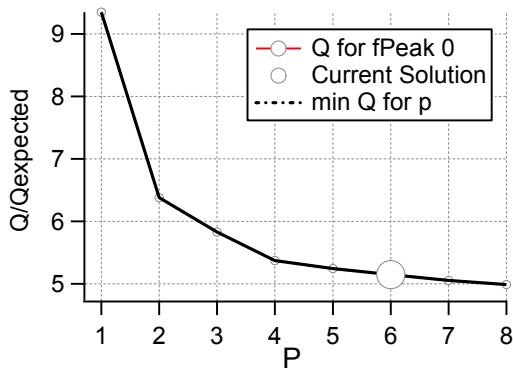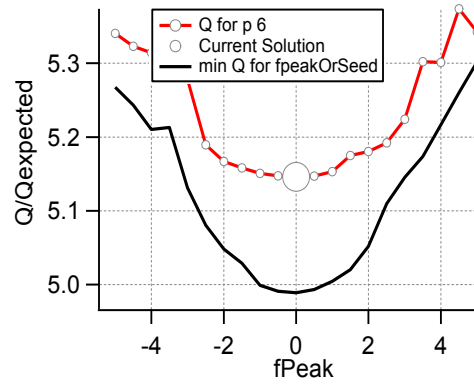

36

37

38

39

40

41

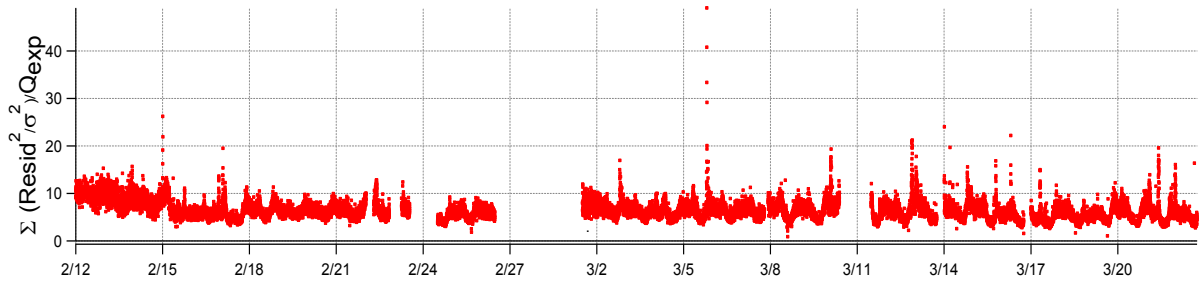

42

43

44

45

46

47

48

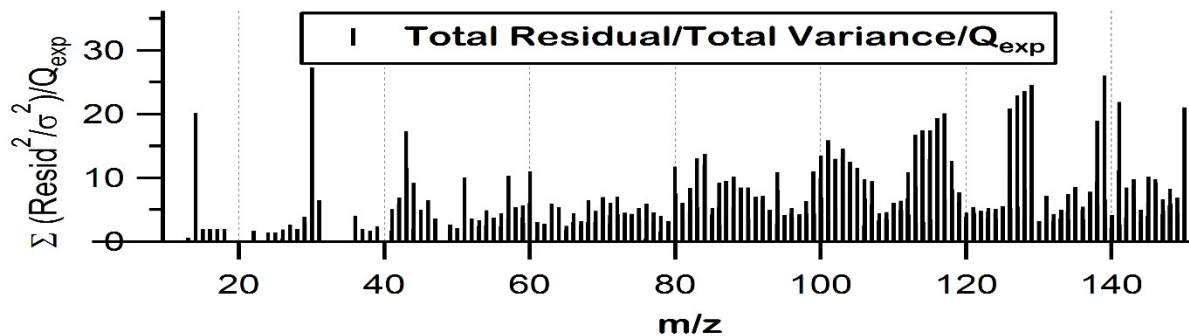

49

50 Fig.S3: Diagnostic information for the PMF analysis.

51

52

53

54

55

56

| No. of factors      | Remarks                                                                                                                                                                                                                                                                  |
|---------------------|--------------------------------------------------------------------------------------------------------------------------------------------------------------------------------------------------------------------------------------------------------------------------|
| <5                  | No HOA or SVOOA factor was identified, one HOA like factor with hydrocarbon dominated mass spectra also has higher $m/z$ 60 signals. Several factors have identical mass spectra with very similar O/C ratios. Some key $m/z$ 's like, 43,44 and 60 have high residuals. |
| 5                   | Still, no clear HOA and SVOOA factors were seen. One HOA looks alike factor has high O/C ratio and $m/z$ 44 signals. $m/z$ 60 still have a high residual in spite of 3 BBOA factors.                                                                                     |
| 6 (Chosen solution) | One clear HOA factor was identified along with one oxygenated POA factor. Types of primary BBOA factors were now reduced to 2. Significant reduction in residuals of key $m/z$ 's was observed.                                                                          |
| 7                   | BBOA factors now started splitting but without any change in $m/z$ 's                                                                                                                                                                                                    |

|     |                                               |
|-----|-----------------------------------------------|
|     | residuals or diurnal patterns                 |
| > 8 | Now, OOA factors were also started splitting. |

57

58 Table S1: Rationale of choosing optimum PMF factors.

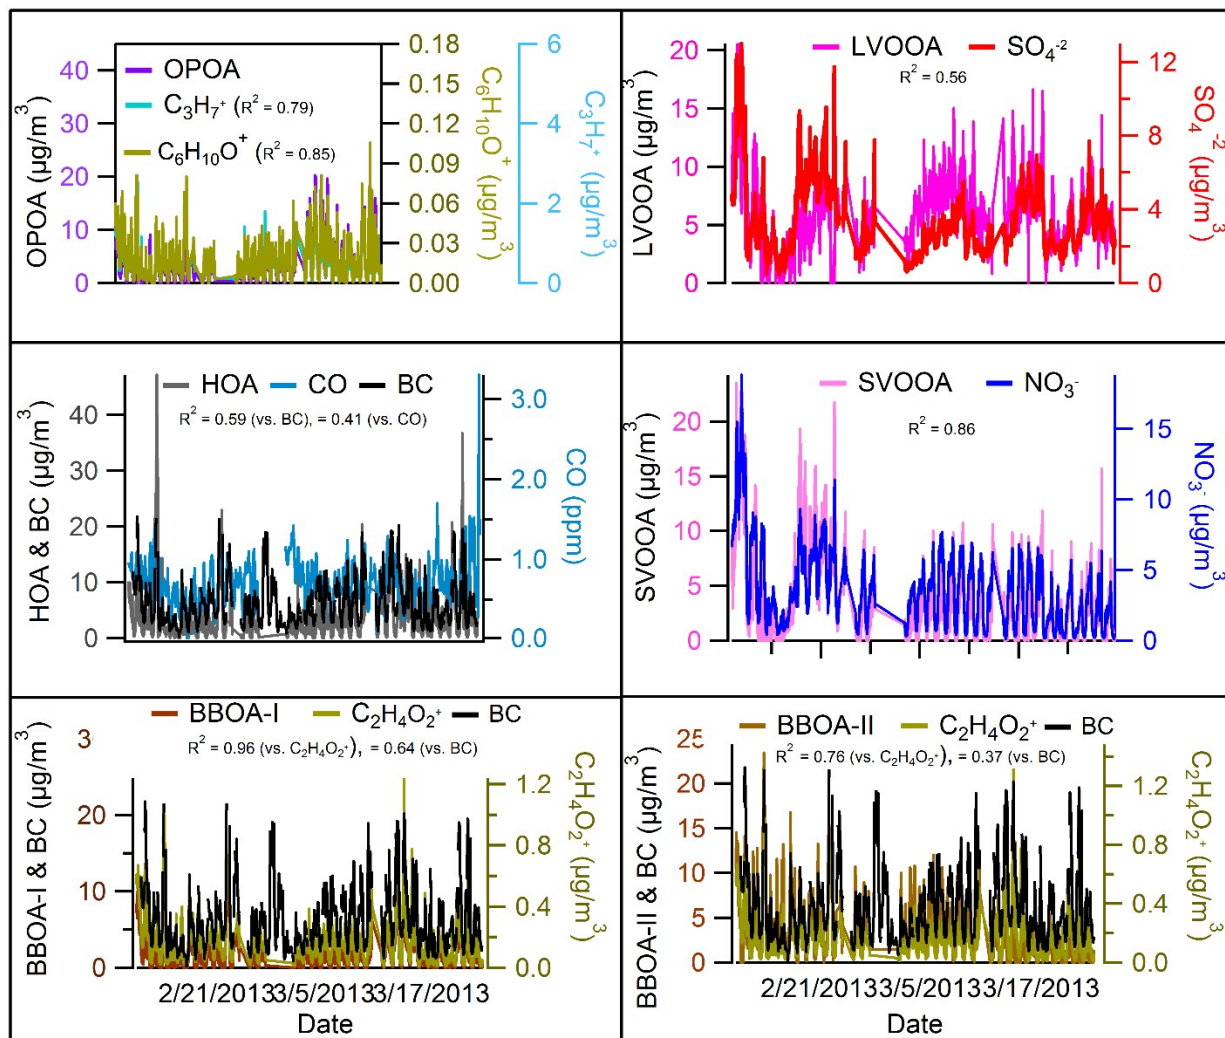

59

60 Fig. S4: Comparison between inter/external tracers and the different OA factors.

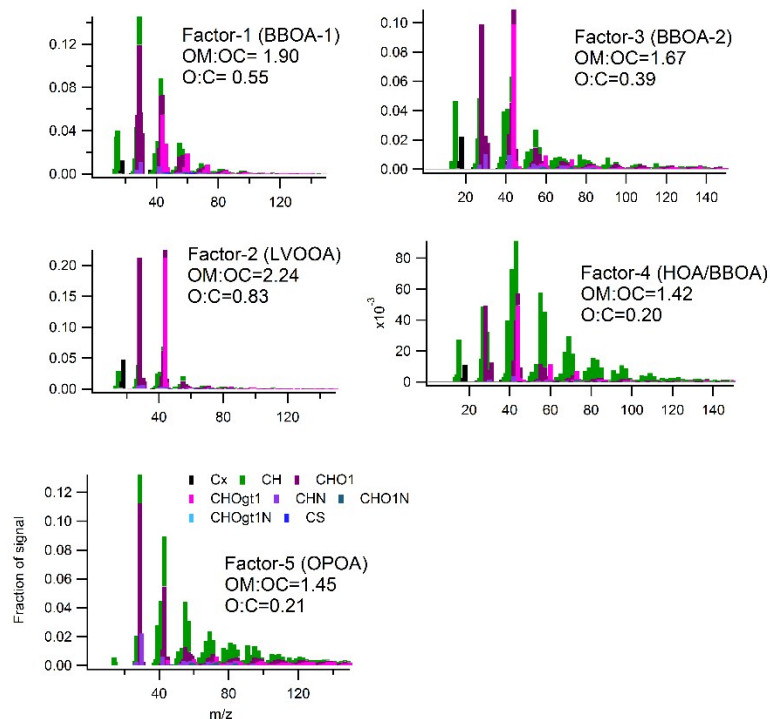

61

62 Figure S5 (a): Factor profiles of 5 factor PMF solution.

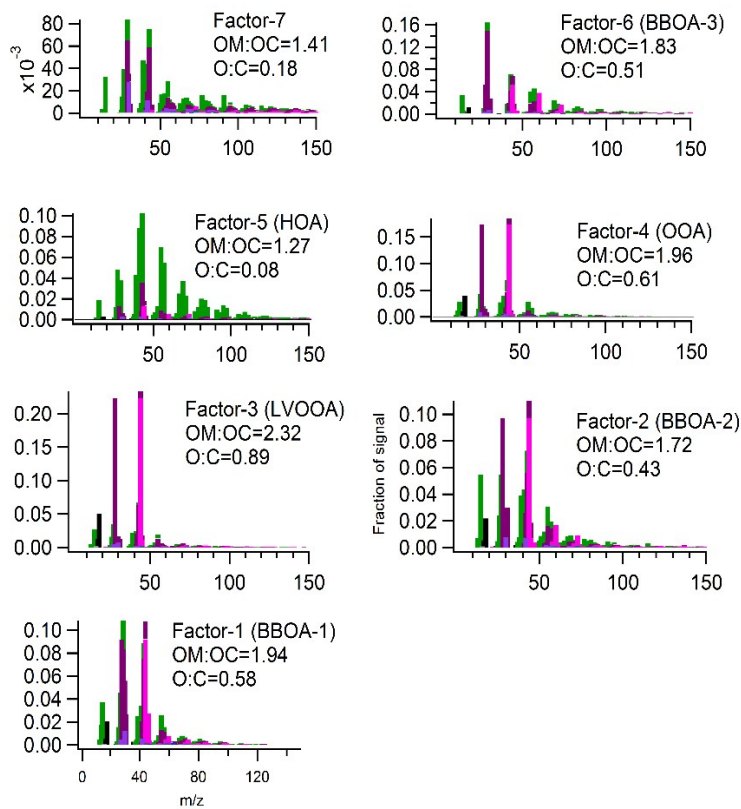

63

64 Figure S5 (b): Factor profiles of 5 7 factor PMF solution.

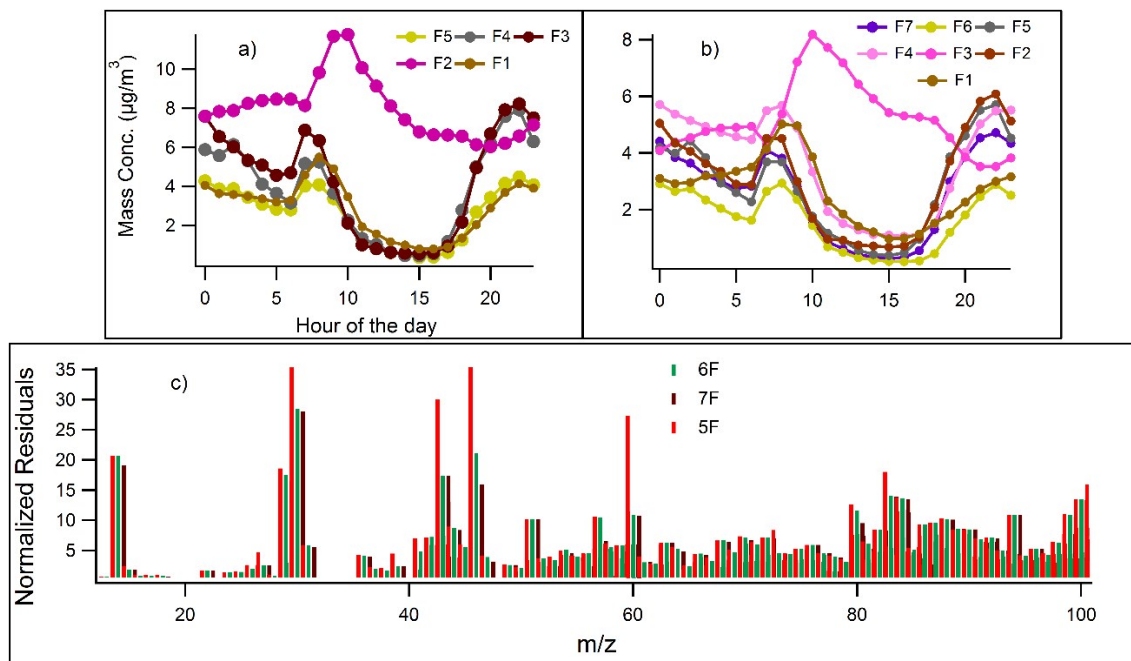

65

66 Fig. S6: Diurnal pattern for a) 5 factor and b) 7 factor PMF solution, c) residuals for 5,6 and 7  
67 factor PMF solutions.

68

69

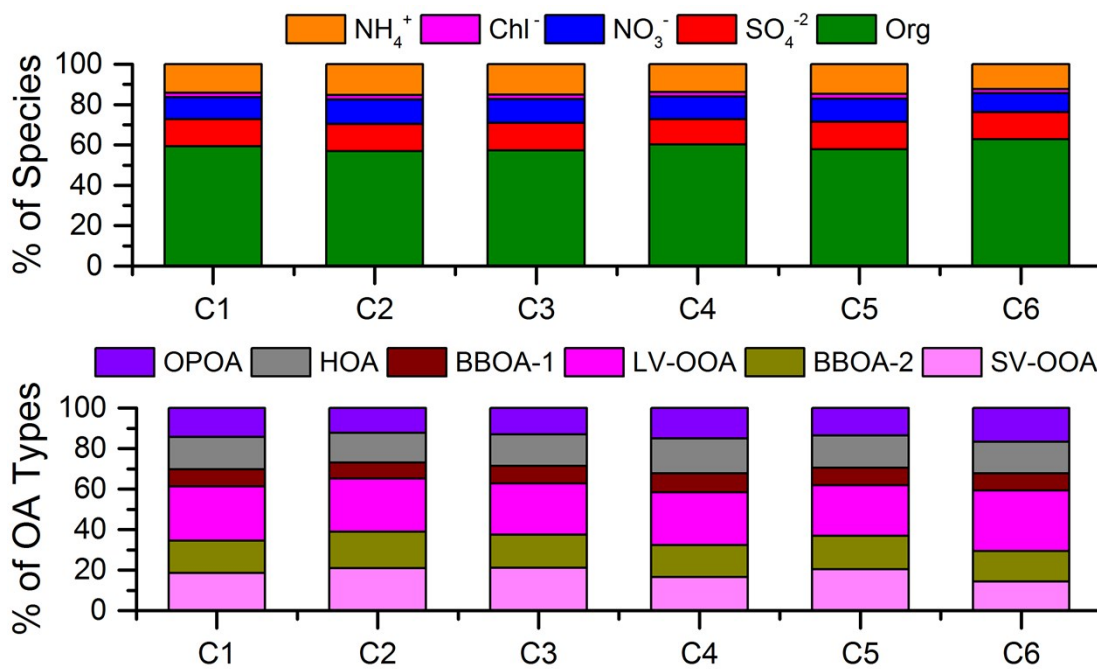

70

71 Fig. S7: Relative contributions of different NR-PM<sub>1</sub> aerosol species and various OAs in the  
72 different air masses. C1..C6 are denoting back trajectory air masses cluster 1 to 6 (Fig. 5).

73

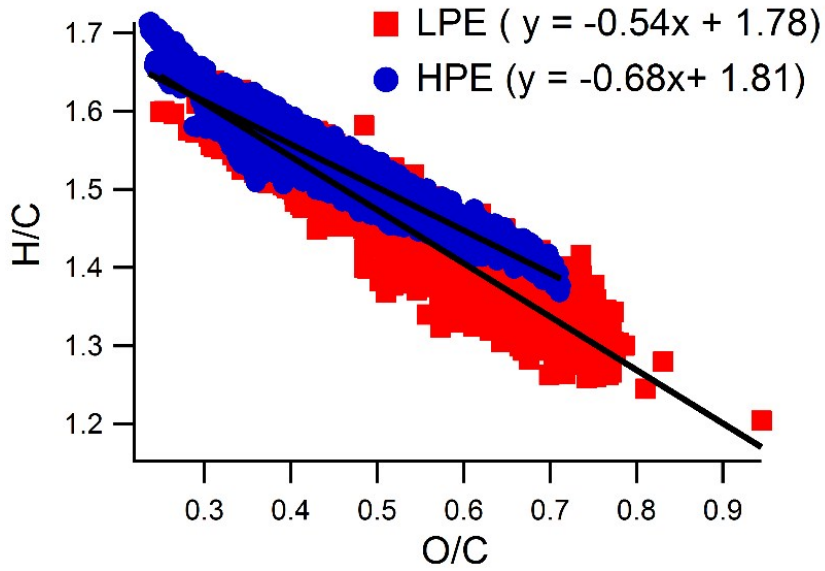

74

75 Fig. S8: Van Krevelen diagram (H/C vs. O/C plot) showing the difference in the slopes of OA  
76 evolution from HPE (High pollution events) and LPE (Low pollution events).

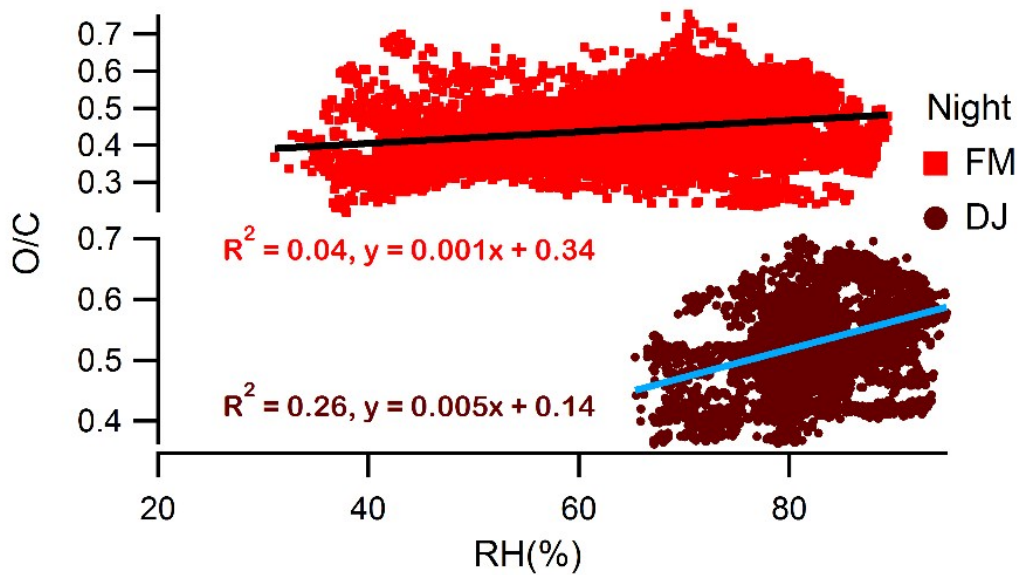

77

78 Fig. S9: RH vs O/C correlation during DJ & FM nights.
